# Supplementary figures and images for: Functional Analysis of the Cathepsin D Gene Response to SGIV Infection in the Orange-Spotted Grouper, Epinephelus coioides
Source: MDPI journal article supplement (doi:10.3390/v14081680), 2022-07-29

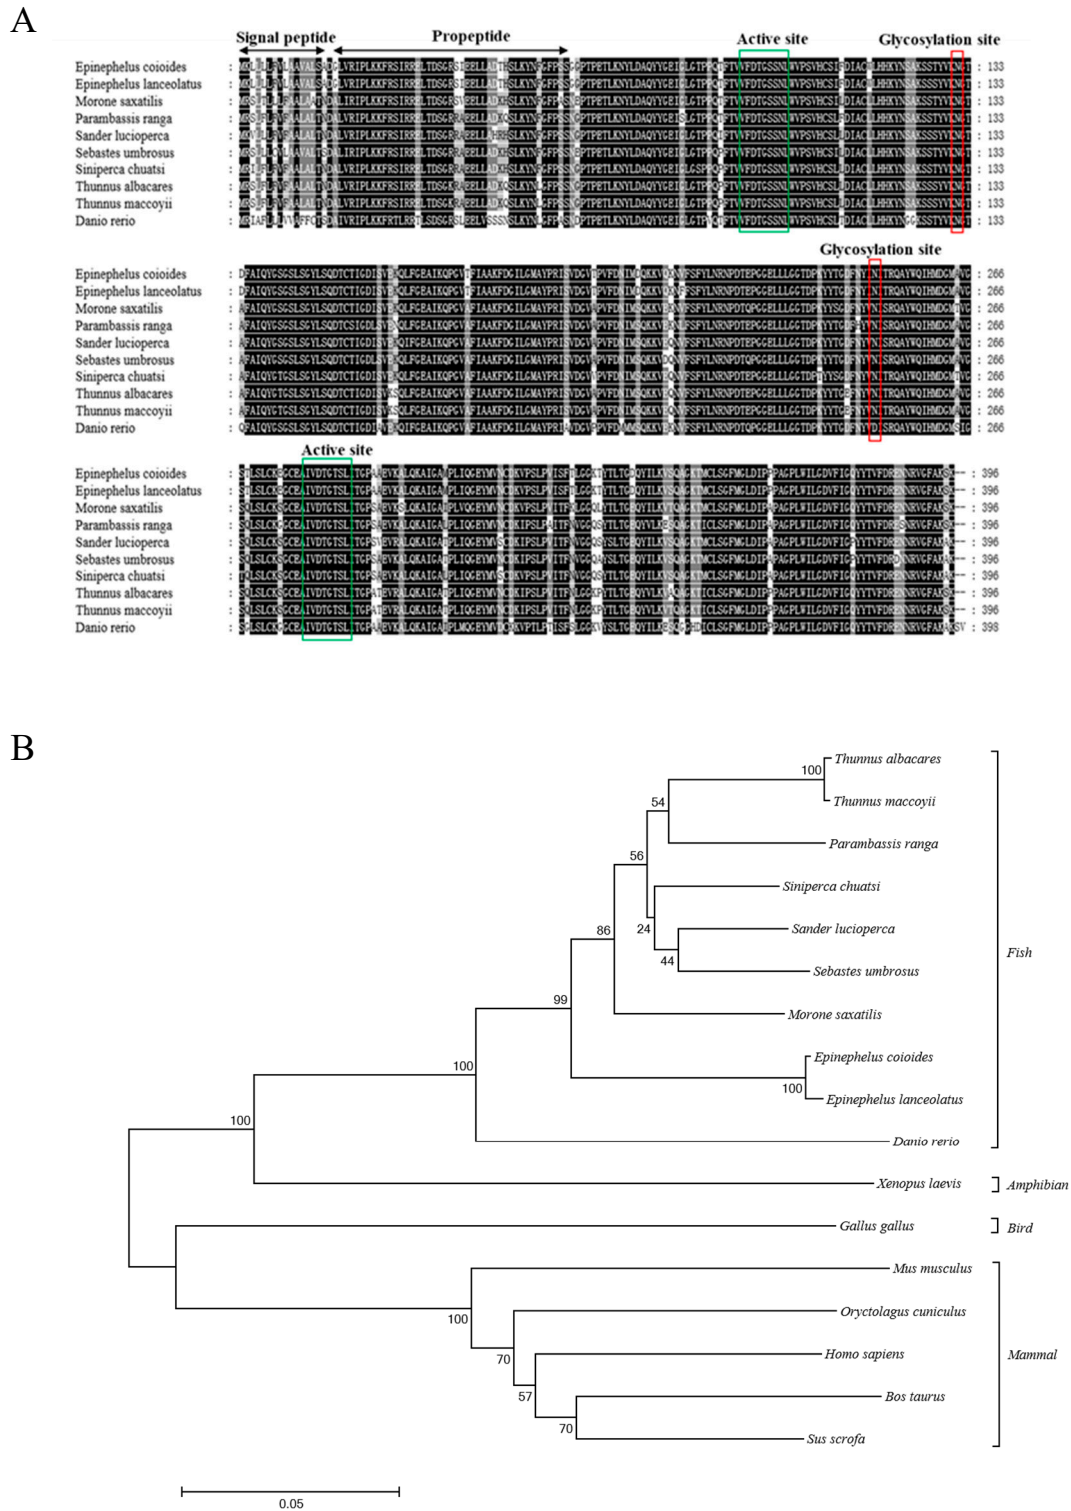

Supplement: s1 [file s1]
